# Supplementary material for: Latent Profiles of Childhood Adversity, Adolescent Mental Health, and Neural Network Connectivity
Source: PubMed Central journal article supplement (PMC11358864; doi:10.1001/jamanetworkopen.2024.30711), 2024-08-28
Supplement: jamanetwopen-e2430711-s002.pdf [file jamanetwopen-e2430711-s002.pdf]

## Data Sharing Statement

Hardi. Latent Profiles of Childhood Adversity, Adolescent Mental Health, and Neural Network Connectivity. *JAMA Netw Open*. Published August 28, 2024.

doi:10.1001/jamanetworkopen.2024.30711

### Data

**Data available:** Yes

**Data types:** Deidentified participant data

**How to access data:** [https://nda-nih-gov.proxy.lib.umich.edu/edit\\_collection.html?id=2106](https://nda-nih-gov.proxy.lib.umich.edu/edit_collection.html?id=2106)

**When available:** With publication

### Supporting Documents

**Document types:** Statistical/analytic code, Informed consent form

**How to access documents:** [https://nda-nih-gov.proxy.lib.umich.edu/edit\\_collection.html?id=2106](https://nda-nih-gov.proxy.lib.umich.edu/edit_collection.html?id=2106)

**When available:** With publication

### Additional Information

**Who can access the data:** Anyone requesting the data

**Types of analyses:** For a specified purpose

**Mechanisms of data availability:** With a signed data access agreement
